# Supplementary material
Source: PubMed Central journal article supplement (PMC4008881)
Supplement: NIHMS575371-supplement-supplement_1.pdf [file NIHMS575371-supplement-supplement_1.pdf]

## Supplemental Fig. 1

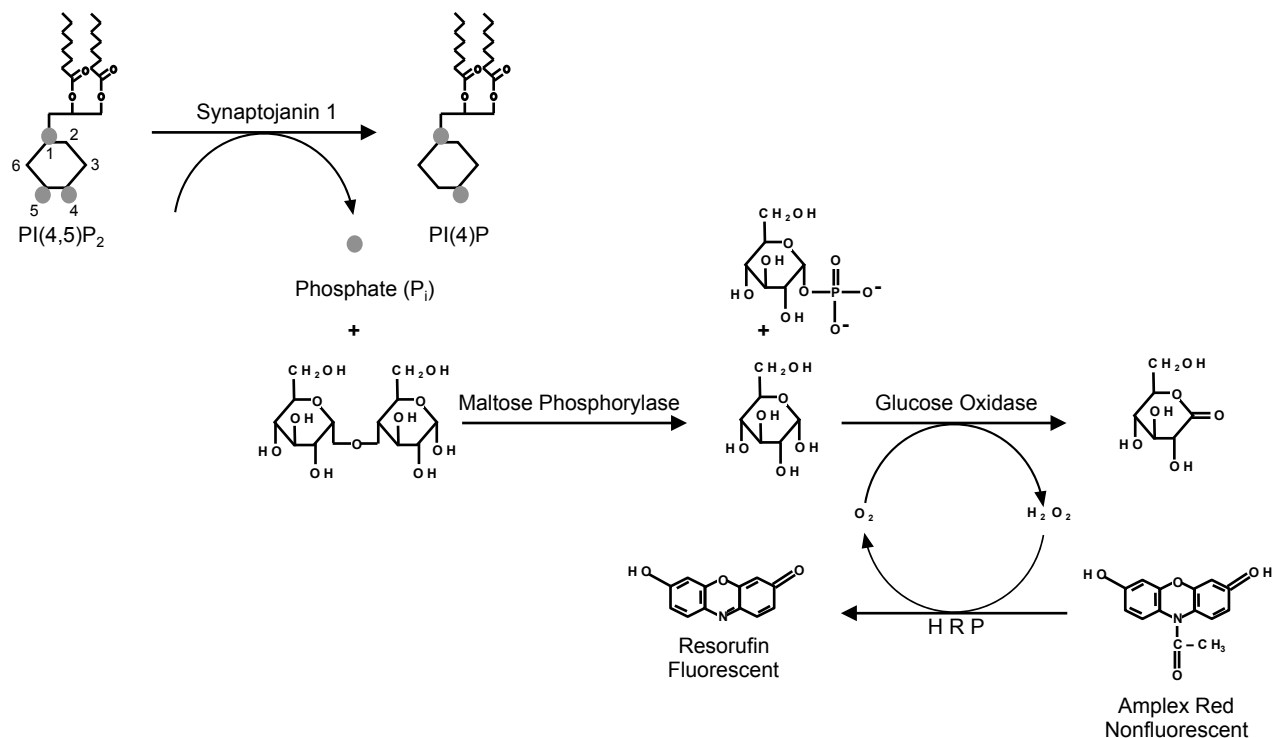

**Supplemental Fig 1. Schematic representation of Synj1 phosphatase activity and fluorescent detection of liberated inorganic phosphate.** The liberation of inorganic phosphate (P<sub>i</sub>) from the substrate di-C8-phosphatidylinositol-4,5-bisphosphate [PI(4,5)P<sub>2</sub>] by Synj1 drives the formation of the fluorescent compound resorufin. Horseradish peroxidase (HRP) is a catalyst for the formation of resorufin.

## Supplemental Fig. 2

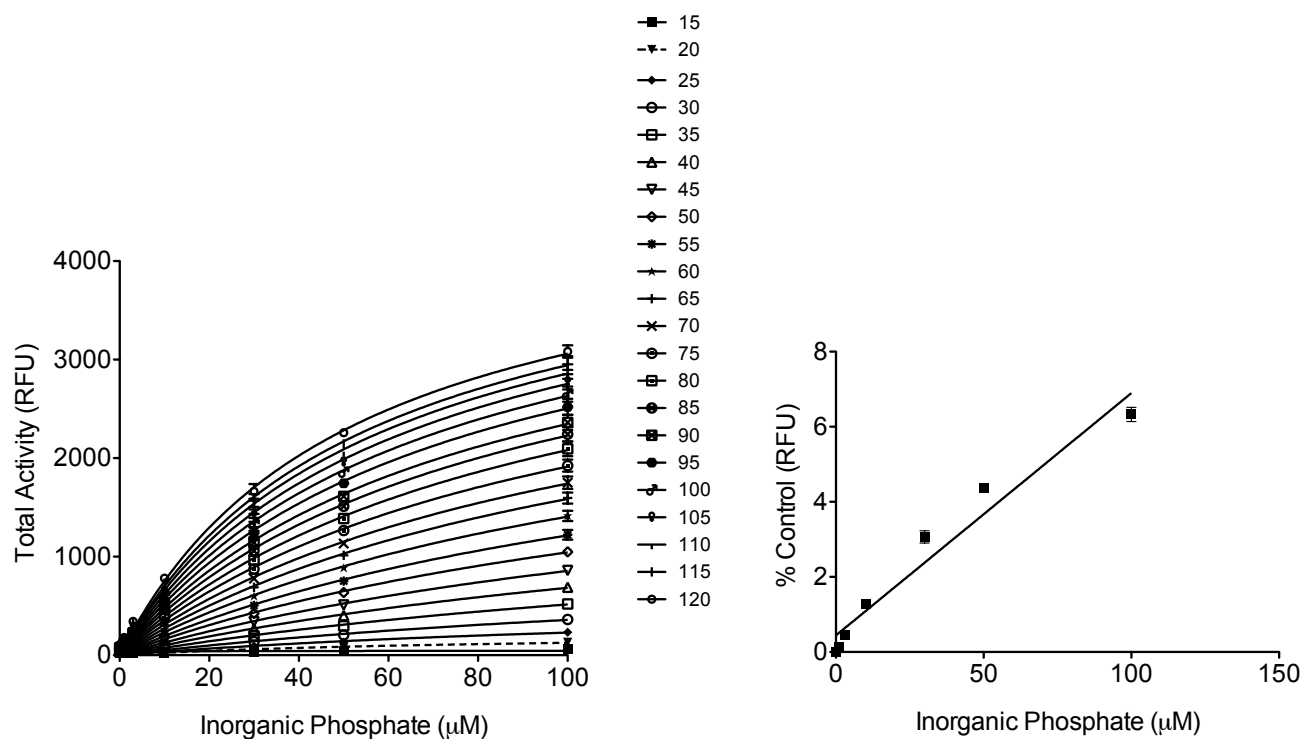

**Supplemental Fig 2. Standard curve generation. (A)** Free phosphate detection from standards of known concentration of potassium phosphate shown as total fluorescent signal in relative fluorescent units (RFU) at time points 15 – 120 minutes after assay start. **(B)** Background fluorescence was subtracted from total fluorescence to determine Specific RFU 100 minutes after reaction start, which is displayed as % total fluorescent control determined by  $H_2O_2$  driven resorufin fluorescence. Error bars represent standard deviation.

## Supplemental Fig. 3

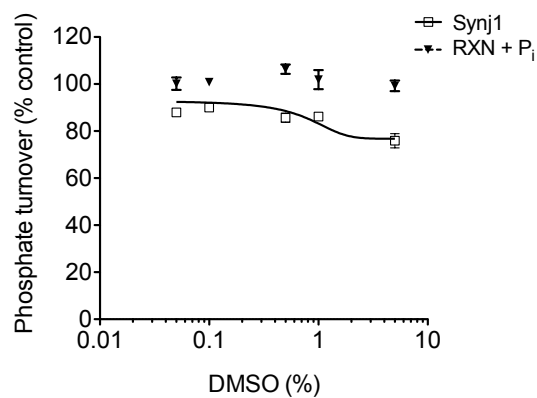

**Supplemental Fig 3. DMSO tolerance.** Free phosphate detection in presence of increasing concentrations of DMSO incubated with Synj1 and 100 $\mu$ M PI(4,5)P<sub>2</sub> (Synj1) or with assay detection enzymes and 100 $\mu$ M potassium phosphate (RXN + P<sub>i</sub>). Phosphate turnover is displayed as % control. Error bars represent standard deviation.
